# Supplementary material for: Optimization and Validation of Thermal Desorption Gas Chromatography-Mass Spectrometry for the Determination of Polycyclic Aromatic Hydrocarbons in Ambient Air
Source: Hindawi journal article supplement (doi:10.1155/2018/8734013), 2018-01-01
Supplement: f1 [file 8734013.f1.pdf]

## Supplementary information

Figure S1. Chromatogram of 16 EPA and deuterated PAHs in SCAN mode, from 0 to 15 min: 1) Naph-d<sub>8</sub>, 2) Naph, 3) Bph-d<sub>10</sub>, 4) Acy, 5) Ace, 6) FL.

Figure S2. Chromatogram of 16 EPA and deuterated PAHs in SCAN mode, from 15 to 20.5 min: 7) Phe-d<sub>10</sub>, 8) Phe, 9) Ant, 10) Ft, 11) Pyr-d<sub>10</sub>, 12) Pyr.

Figure S3. Chromatogram of 16 EPA and deuterated PAHs in SCAN mode, from 22.5 to 35.5 min: 13) BaA-d<sub>12</sub>, 14) BaA, 15) Chry, 16) BbFt, 17) BkFt, 18) BaP-d<sub>10</sub>, 19) BaP, 20) IP, 21) DBahA, 22) BghiP-d<sub>12</sub>, 23) BghiP.

Figure S4. PAHs and deuterated PAHs in SIM windows (m/z 226,240,228 and 234) in the analysis of NIST SRM 1649b dust.

Figure S5. PAHs and deuterated PAHs in SIM windows (m/z 252 and 264) in the analysis of NIST SRM 1649b dust.

Figure S6. PAHs and deuterated PAHs in SIM windows (m/z 276, 288 and 278) in the analysis of NIST SRM 1649b dust.

Figure S7. PAHs and deuterated PAHs in m/z 300 SIM window in the analysis of NIST SRM 1649b dust.

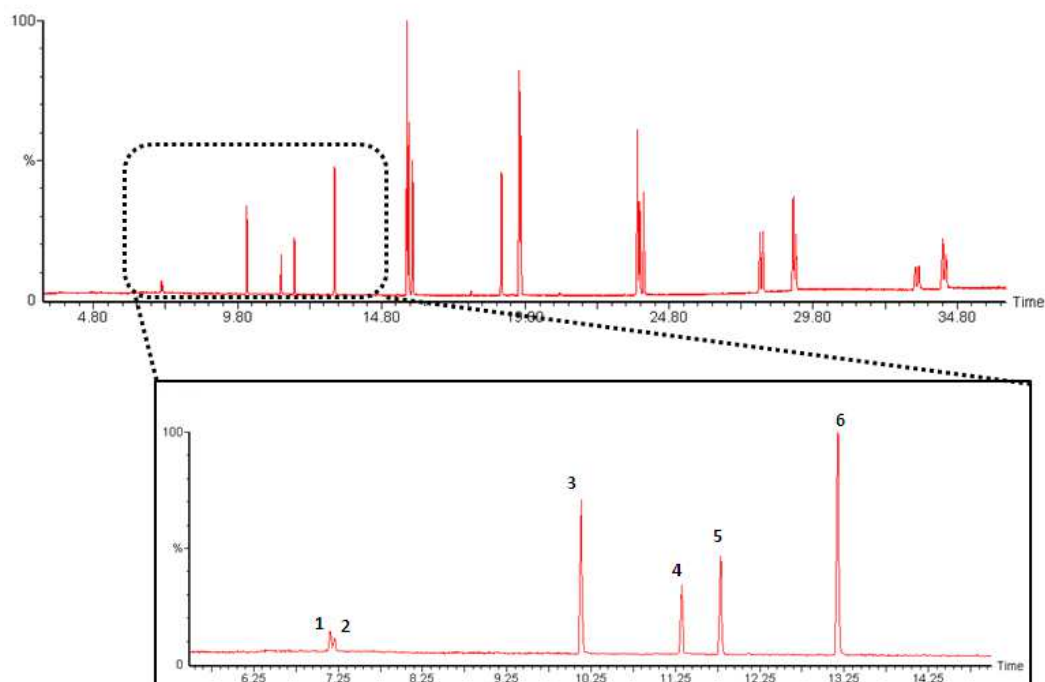

Figure S1. Chromatogram of 16 EPA and deuterated PAHs in SCAN mode, from 0 to 15 min: 1) Naph-<sub>d</sub><sub>8</sub>, 2) Naph, 3) Bph-<sub>d</sub><sub>10</sub>, 4) Acy, 5) Ace, 6) FL.

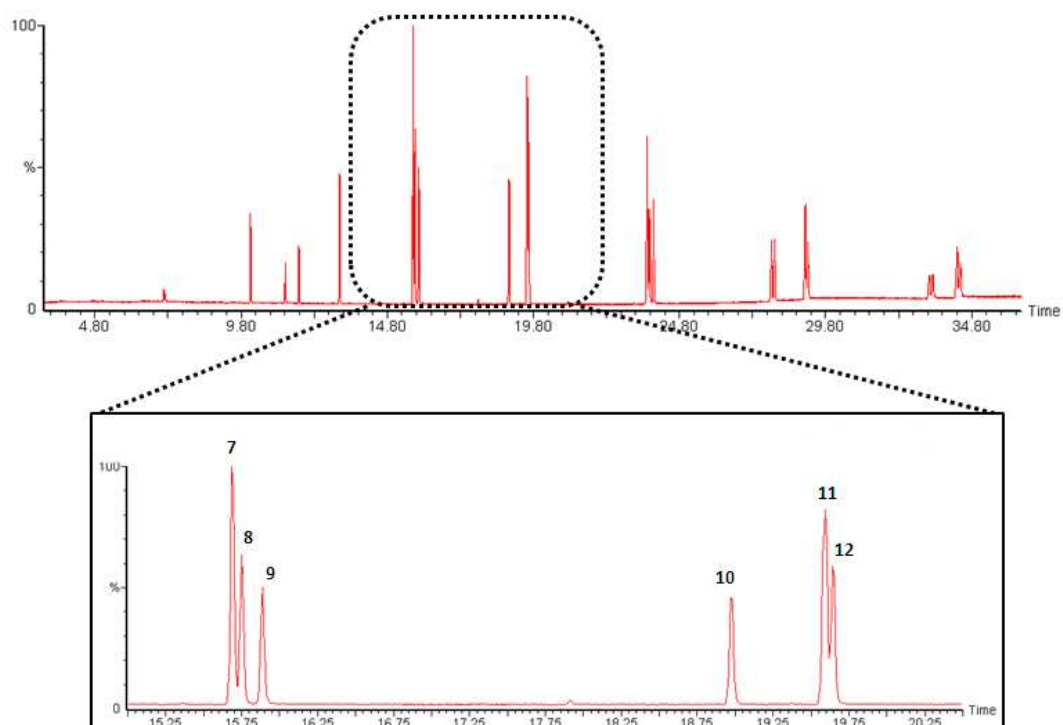

Figure S2. Chromatogram of 16 EPA and deuterated PAHs in SCAN mode, from 15 to 20.5 min: 7) Phe-<sub>d</sub><sub>10</sub>, 8) Phe, 9) Ant, 10) Ft, 11) Pyr-<sub>d</sub><sub>10</sub>, 12) Pyr.

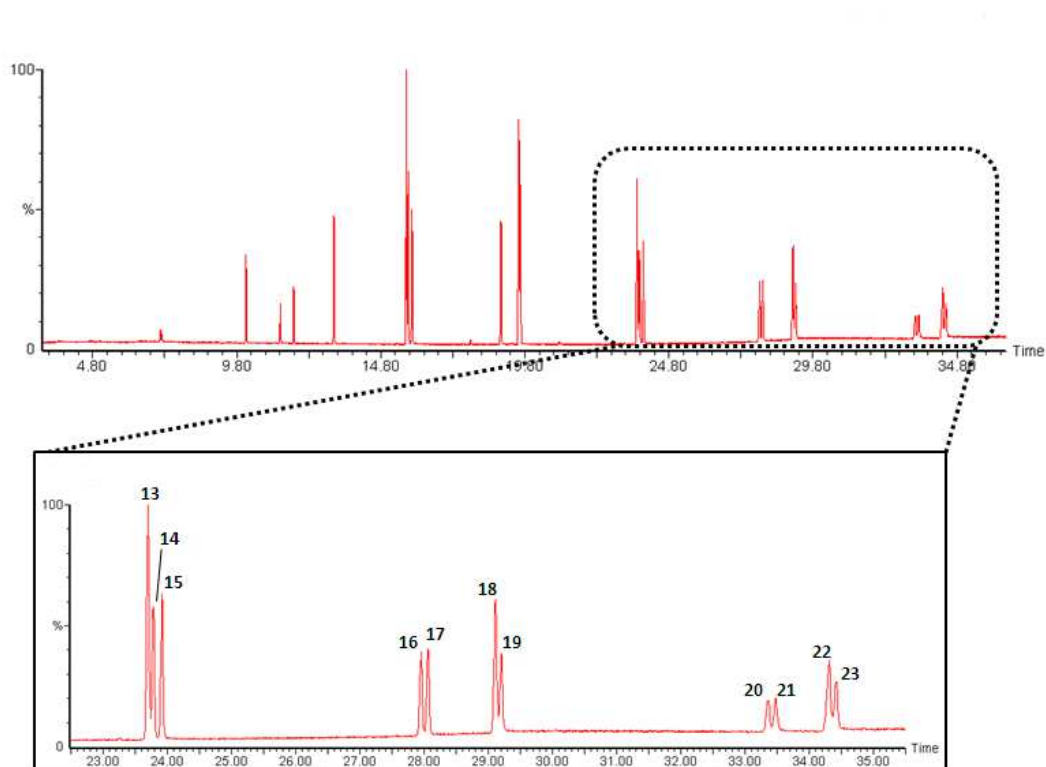

Figure S3. Chromatogram of 16 EPA and deuterated PAHs in SCAN mode, from 22.5 to 35.5 min: 13) BaA-d<sub>12</sub>, 14) BaA, 15) Chry, 16) BbFt, 17) BkFt, 18) BaP-d<sub>10</sub>, 19) BaP, 20) IP, 21) DBahA, 22) BghiP-d<sub>12</sub>, 23) BghiP.

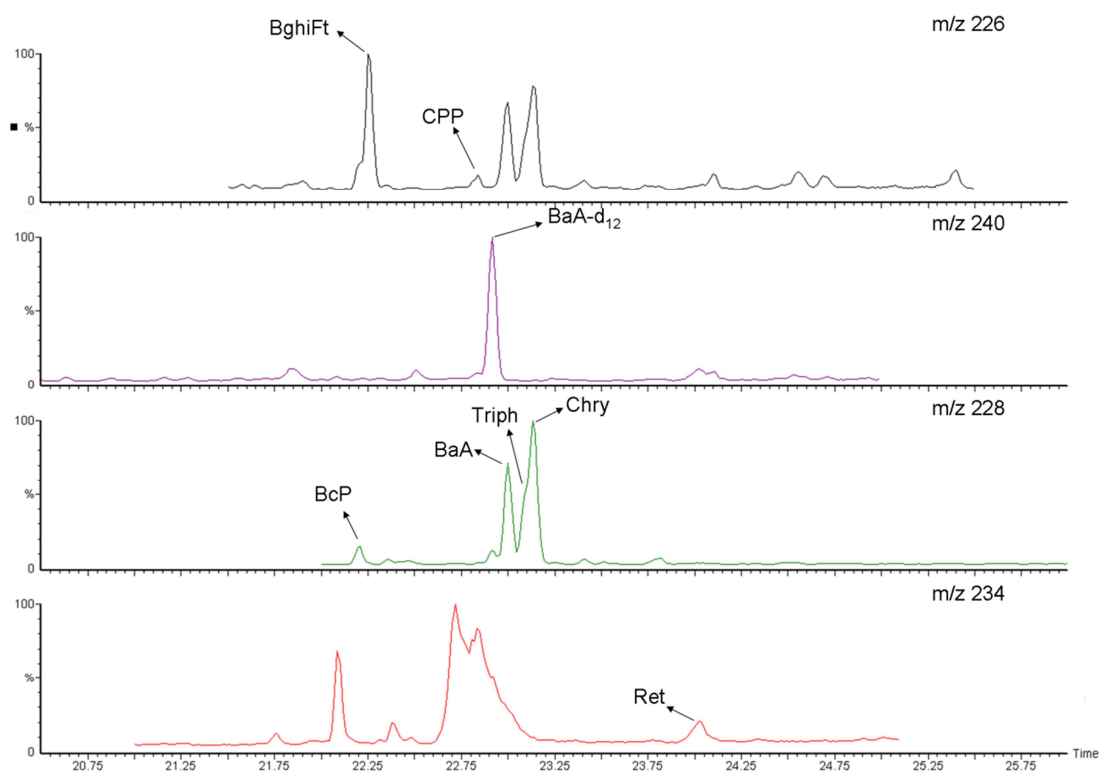

Figure S4. PAHs and deuterated PAHs in SIM windows (m/z 226,240,228 and 234) in the analysis of NIST SRM 1649b dust.

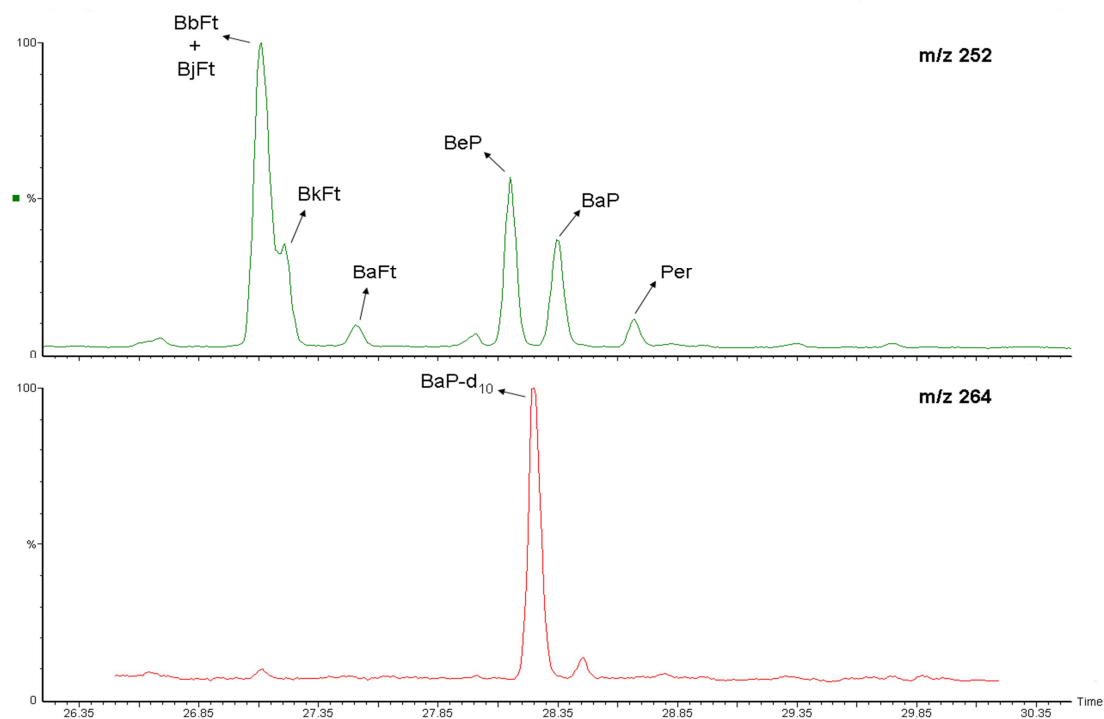

Figure S5. PAHs and deuterated PAHs in SIM windows (m/z 252 and 264) in the analysis of NIST SRM 1649b dust.

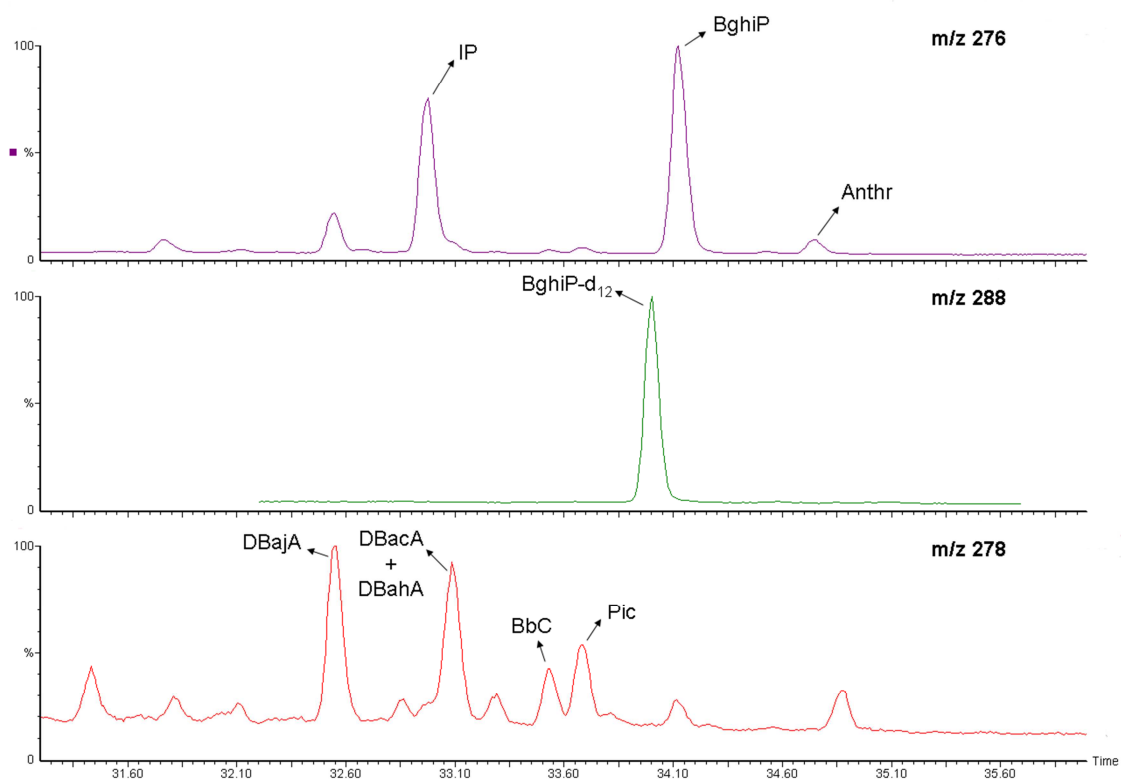

Figure S6. PAHs and deuterated PAHs in SIM windows (m/z 276, 288 and 278) in the analysis of NIST SRM 1649b dust.

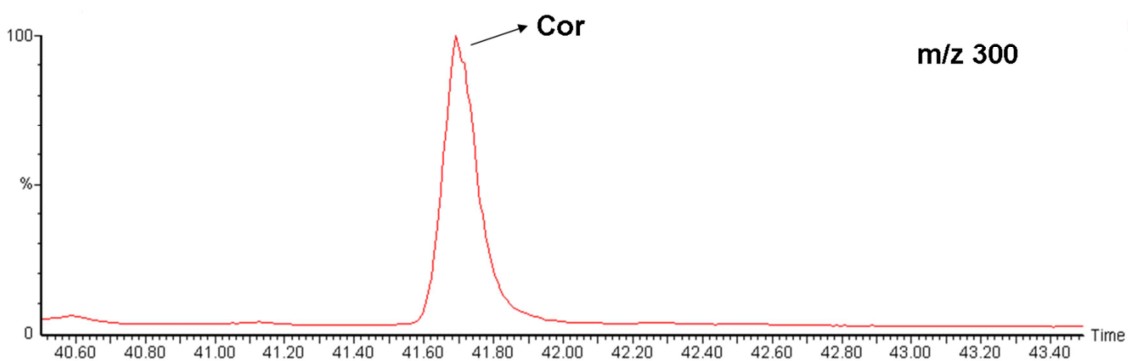

Figure S7. PAHs and deuterated PAHs in m/z 300 SIM window in the analysis of NIST SRM 1649b dust.
